# Supplementary material for: Analysis of VEGFR-2 and PDGFR-β expression in canine splenic hemangiosarcoma to identify drug repositioning candidates
Source: PubMed Central journal article supplement (PMC11315467; doi:10.29374/2527-2179.bjvm001524), 2024-08-06
Supplement: bjvm-46-e001524-Suppl.pdf [file bjvm-46-e001524-Suppl.pdf]

**Supplementary Table 1.** The normality test demonstrated that our data do not follow a Gaussian curve.

| <b>Test for normal distribution</b> |         |
|-------------------------------------|---------|
| Anderson-Darling test               |         |
| A2*                                 | 2,114   |
| P value                             | <0,0001 |
| Passed normality test (alpha=0.05)? | No      |
| P value summary                     | ****    |
| D'Agostino & Pearson test           |         |
| K2                                  | 10,04   |
| P value                             | 0,0066  |
| Passed normality test (alpha=0.05)? | No      |
| P value summary                     | **      |
| Shapiro-Wilk test                   |         |
| W                                   | 0,7205  |
| P value                             | 0,0001  |
| Passed normality test (alpha=0.05)? | No      |
| P value summary                     | ***     |
| Kolmogorov-Smirnov test             |         |
| KS distance                         | 0,3465  |
| P value                             | <0,0001 |
| Passed normality test (alpha=0.05)? | No      |
| P value summary                     | ****    |
| Number of values                    | 18      |
